# Supplementary material for: Ethnic-specific associations of rare and low-frequency DNA sequence variants with asthma
Source: PubMed Central journal article supplement (PMC4309441; doi:10.1038/ncomms6965), 2015-01-16
Supplement: ncomms6965-s1.pdf [file ncomms6965-s1.pdf]

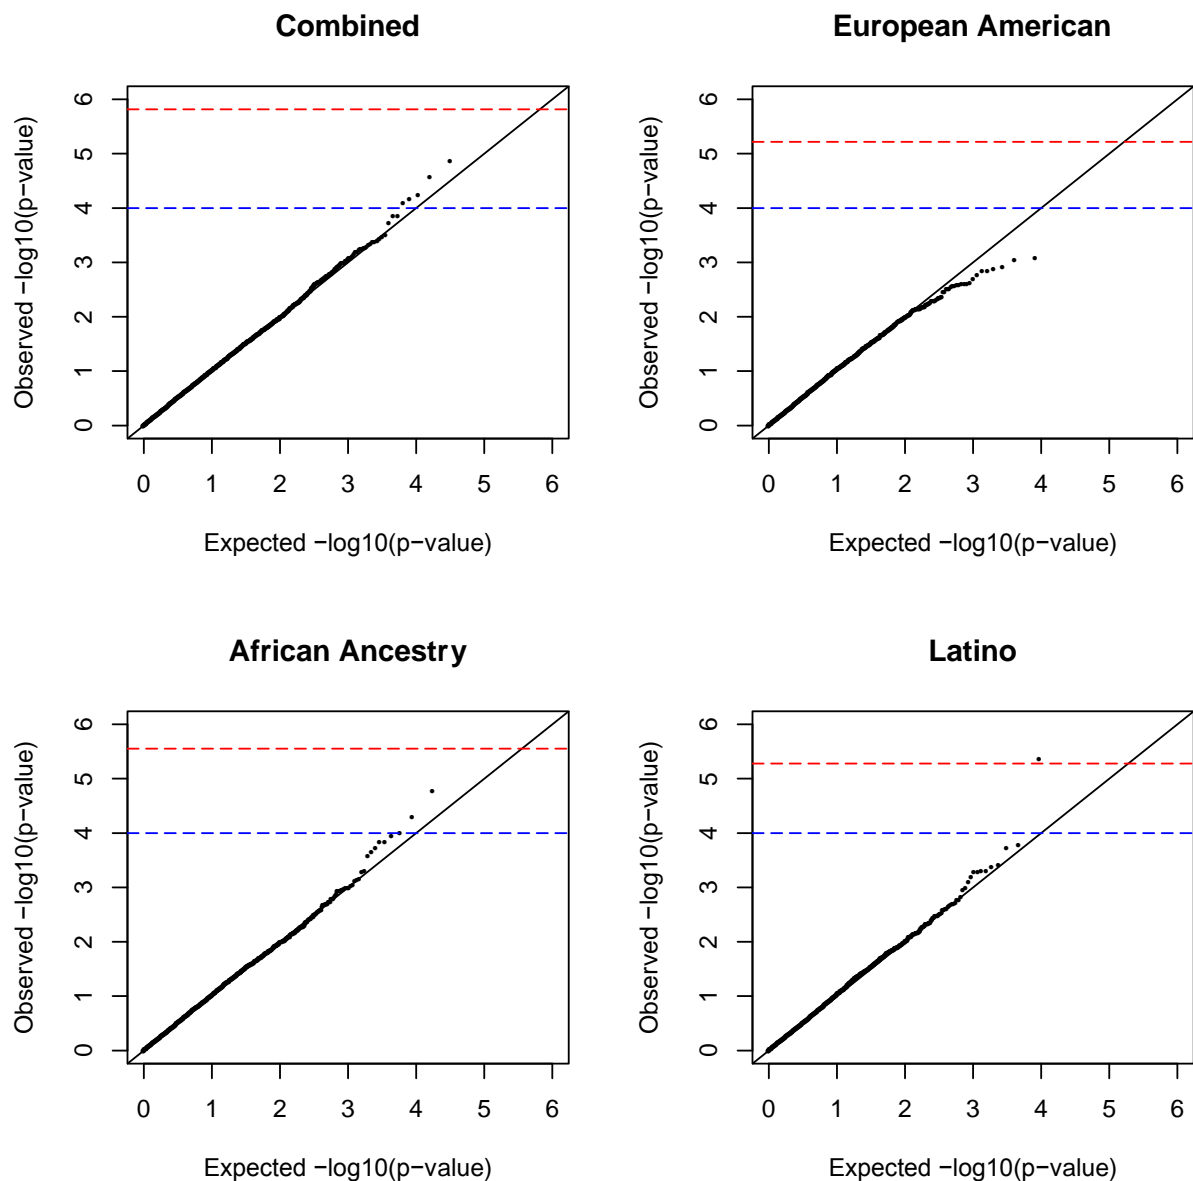

**Supplementary Figure 1: QQplots of single variant meta-analyses of low frequency, functional variants and asthma risk.** We considered 32,681 variants in the combined sample (N=11,225), 8,249 in European Americans (N=4,363), 17,861 in African Ancestry (N=2,308), and 9,519 in Latinos (N=4,554). Dashed red line shows the Bonferroni threshold of significance (corrected for number of variants tested). Dashed blue line shows  $P=0.0001$ .

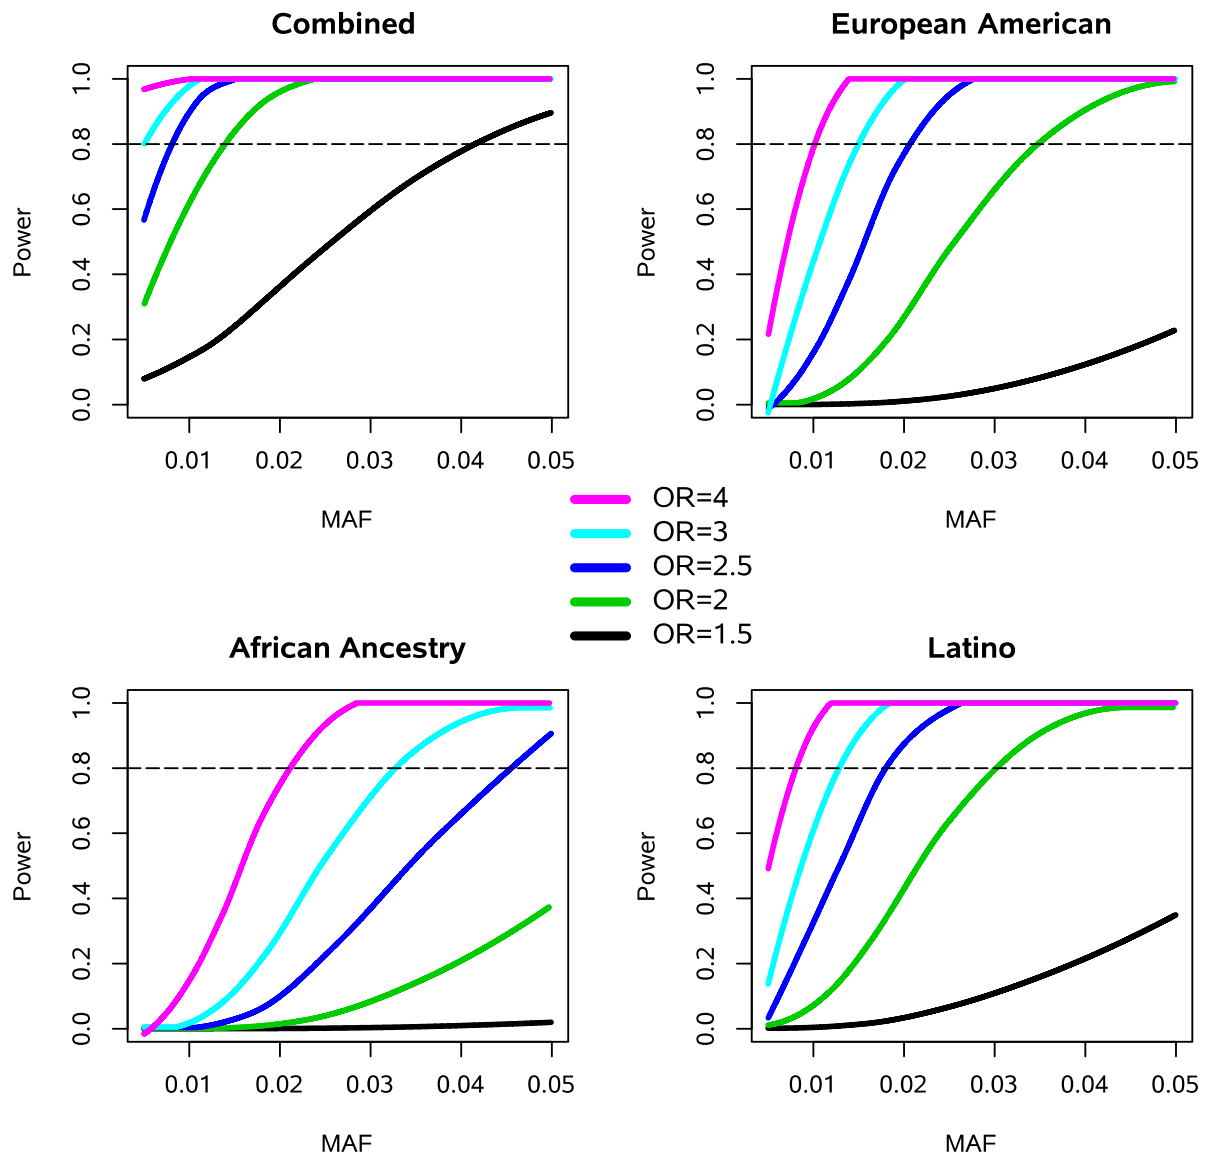

**Supplementary Figure 2: Power analyses for low frequency single variant meta analyses.**

For each ethnic group and the combined sample, 1,000 variants with MAF 0.5%-5% were randomly sampled for simulations; meta-analyses were performed using the same allele frequency structure in our data and the same study design of our study to maintain a 5% type I error. We performed simulations with ORs=1.5, 2, 2.5, 3, and 4, and fit a local linear regression curve. Dashed horizontal lines represents 80% power in the meta-analysis.

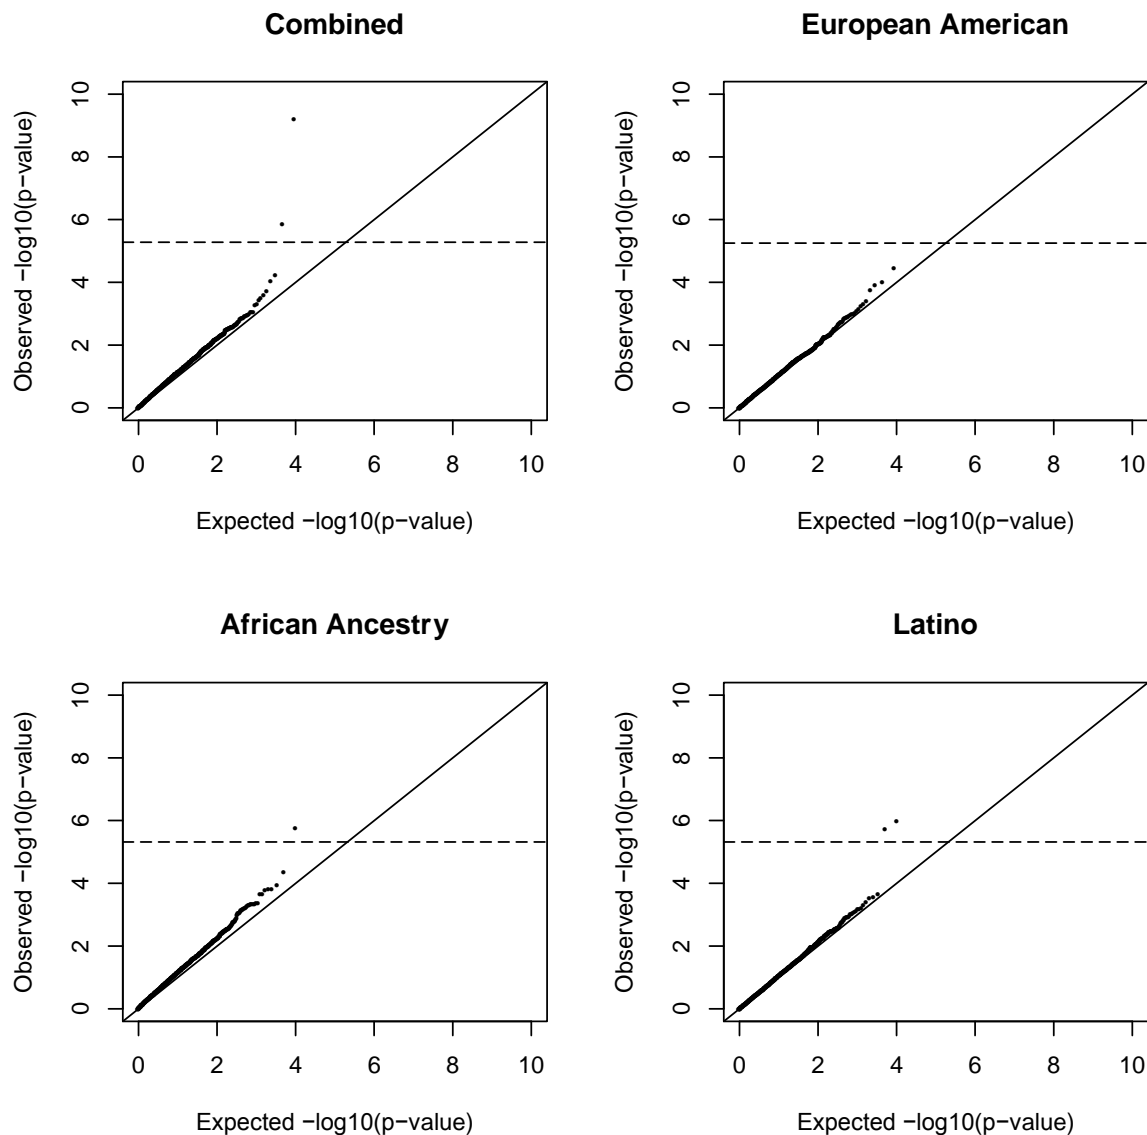

**Supplementary Figure 3: Gene-based meta-analyses qqplots for functional variants defined as missense, nonsense and splicing and equal variant weights.** Gene-based analyses of functional variants were conducted using equal variant weights (MetaSKAT-O<sup>1</sup>). All genes with at least 3 functional variants that were present in at least two studies were included in this analysis. All missense, nonsense and splice site variants (regardless of MAF) were considered functional, resulting in analysis of 8,933 genes in European Americans (N=3,281), 10,342 genes in African Americans (N=2,308), 10,439 genes in Latinos (N=3,912) and 9,534 genes in the combined sample (N=9,501). Dashed line represents the Bonferroni threshold of significance (corrected for number of genes tested).

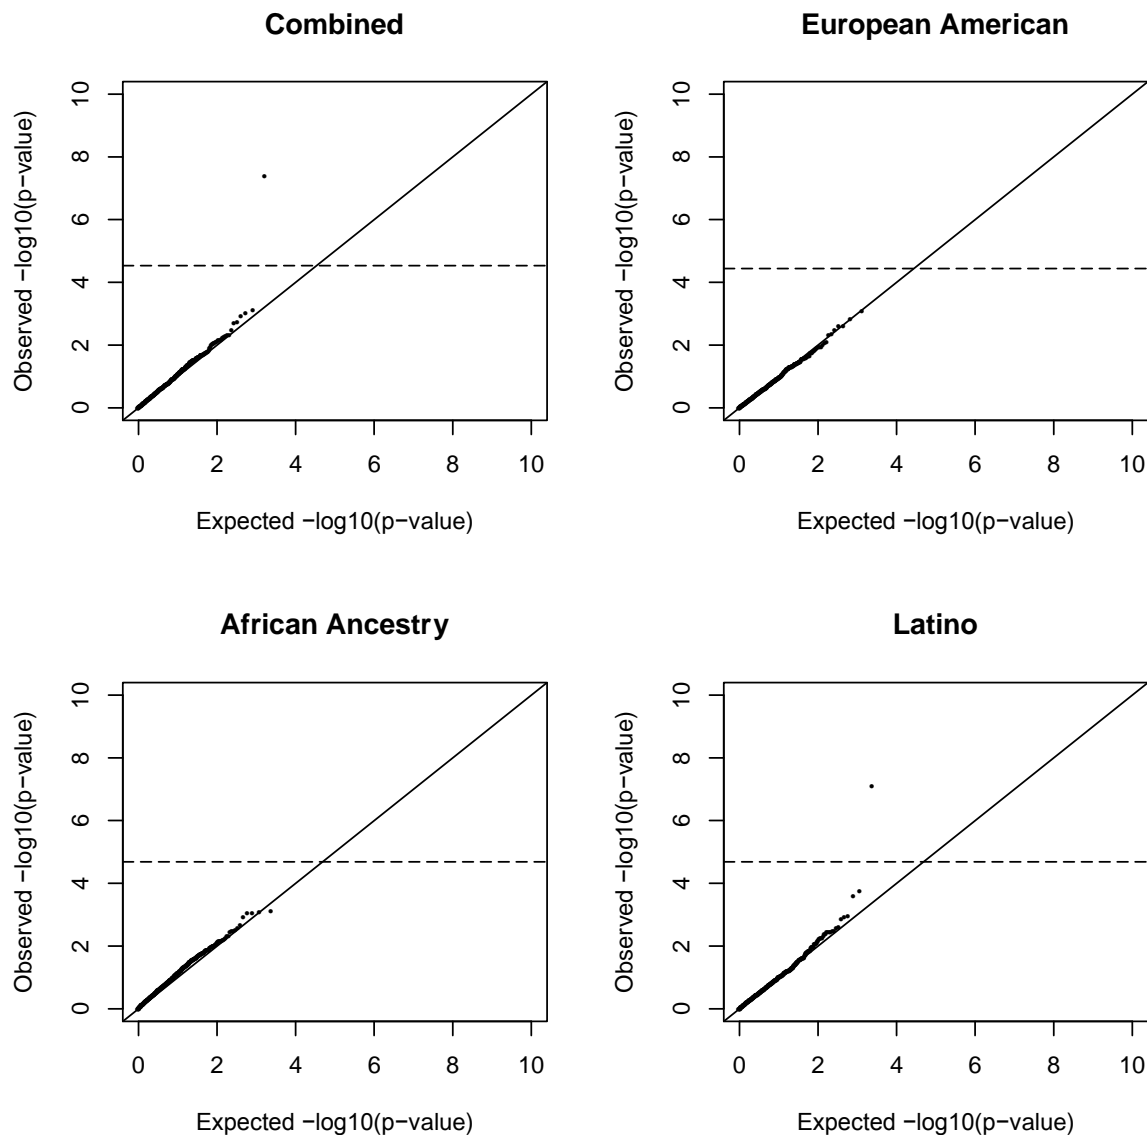

**Supplementary Figure 4: Gene-based meta-analyses qqplots for functional variants defined as PolyPhen-2 probably damaging variants and equal variant weights.** Gene-based analyses of functional variants were conducted using equal variant weights (MetaSKAT-O). All genes with at least 3 functional variants that were present in at least two studies were included in this analysis. All variants predicted to be ‘probably damaging’ by PolyPhen-2 were considered functional, resulting in analysis of 1,977 genes in European Americans (N=3,281), 2,465 genes in African Ancestry (N=2,308), 2,427 genes in Latinos (N=3,912) and 2,316 genes in the combined sample (N=9,501). Dashed line represents the Bonferroni threshold of significance (corrected for number of genes tested).

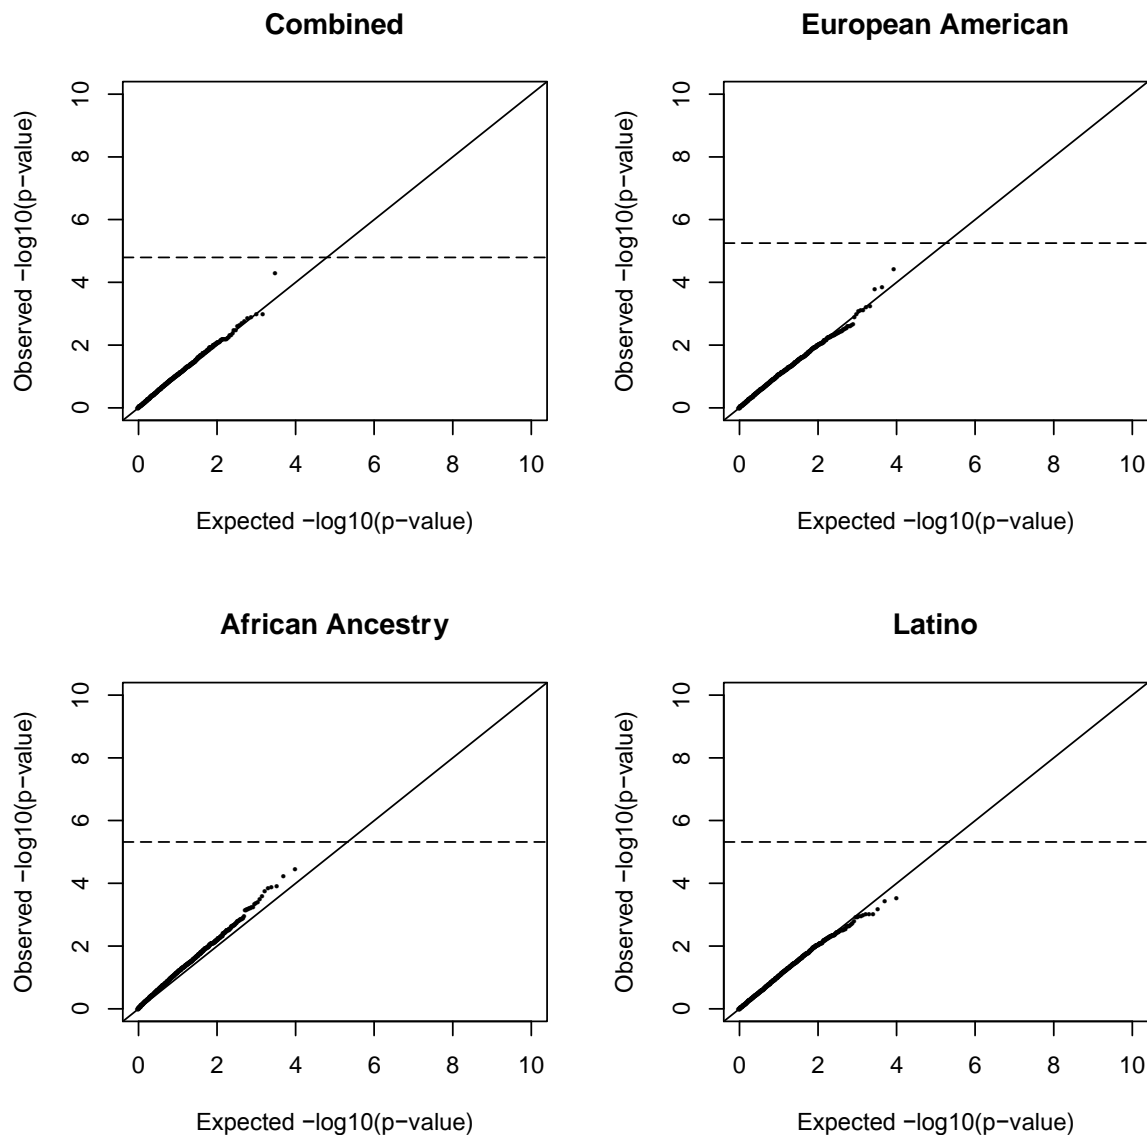

**Supplementary Figure 5: Gene-based meta-analyses qqplots for functional variants defined as missense, nonsense and splicing and rare variant weights.** Gene-based analyses of functional variants were conducted using rare variant weights (MetaSKAT-O default). All genes with at least 3 functional variants that were present in at least two studies were included in this analysis. All missense, nonsense and splice site variants (regardless of MAF) were considered functional, resulting in analysis of 8,933 genes in European Americans (N=3,281), 10,342 genes in African Americans (N=2,308), 10,439 genes in Latinos (N=3,912) and 9,534 genes in the combined sample (N=9,501). Dashed line represents the Bonferroni threshold of significance (corrected for number of genes tested).

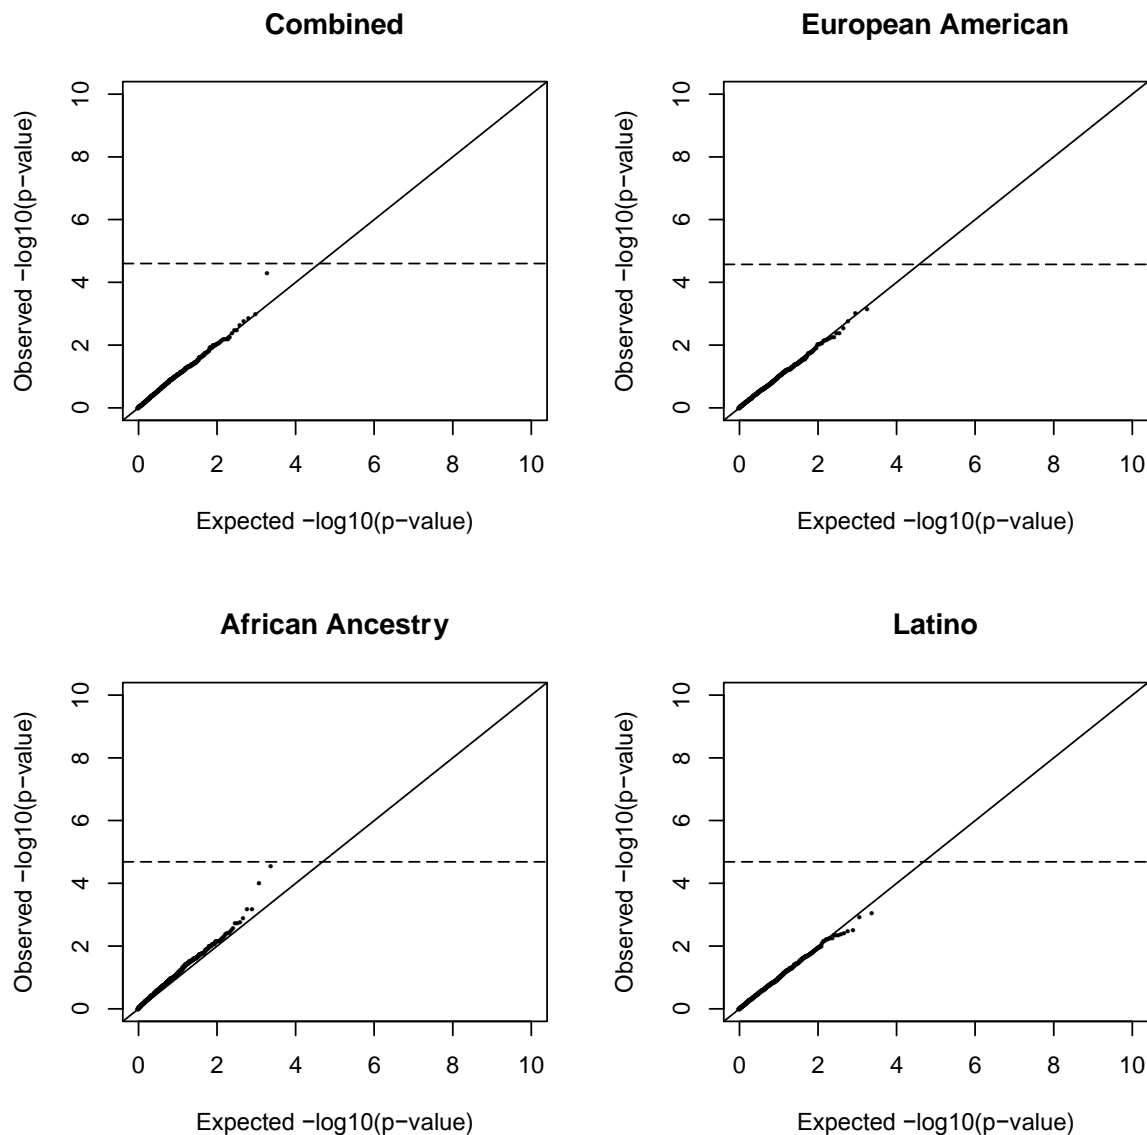

**Supplementary Figure 6: Gene-based meta-analyses qqplots for functional variants defined as PolyPhen-2 probably damaging variants and rare variant weights.** Gene-based analyses of functional variants were conducted using rare variant weights (MetaSKAT-O default). All genes with at least 3 functional variants that were present in at least two studies were included in this analysis. All variants predicted to be ‘probably damaging’ by PolyPhen-2 were considered functional, resulting in analysis of 1,977 genes in European Americans (N=3,281), 2,465 genes in African Ancestry (N=2,308), 2,427 genes in Latinos (N=3,912) and 2,316 genes in the combined sample (N=9,501). Dashed line represents the Bonferroni threshold of significance (corrected for number of genes tested).

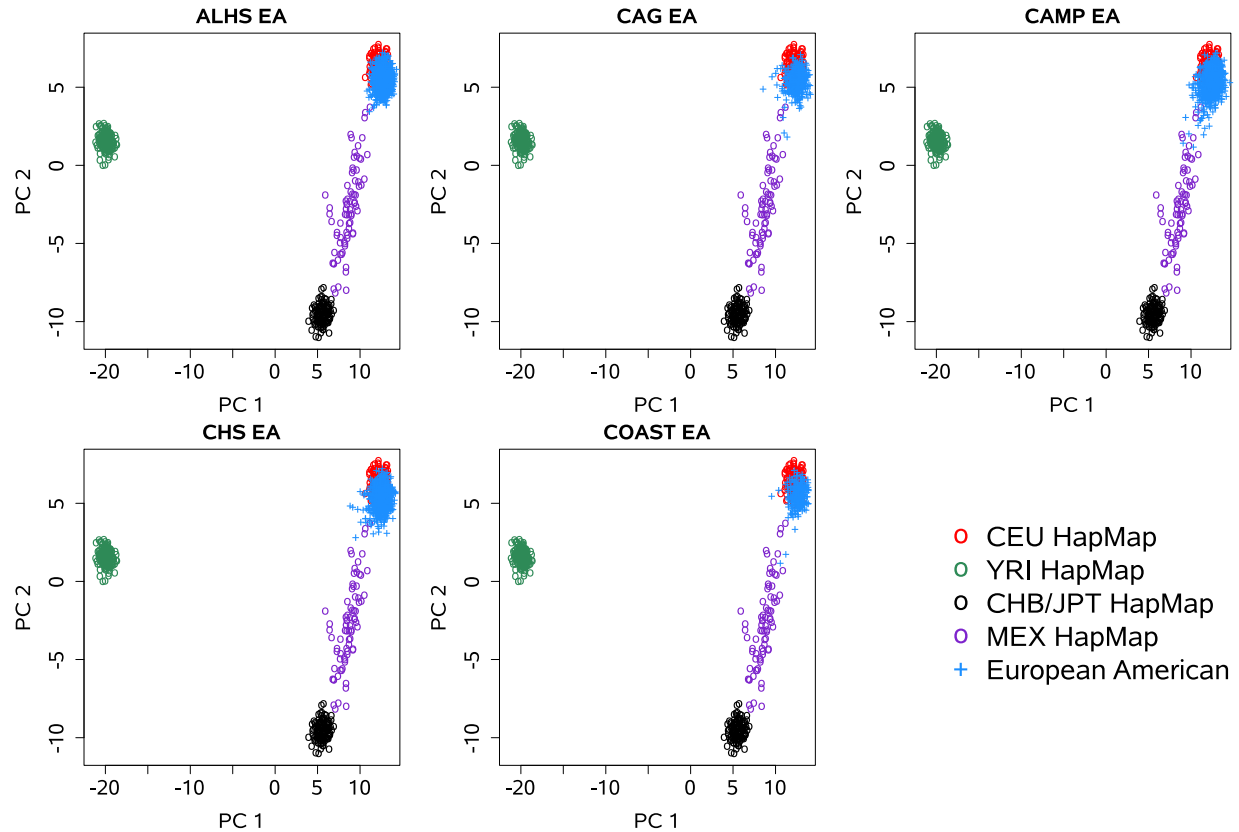

**Supplementary Figure 7: PCA of European American studies projected onto HapMap subjects.** Each panel represents one of the 5 European American studies included in the meta analysis<sup>2,3</sup> (ALHS, Agricultural Lung Health Study<sup>4</sup> [Supplementary Note 1]; CAG, Chicago Asthma Genetics Study; CAMP, Childhood Asthma Management Program; CHS, The Children’s Health Study; COAST, The Childhood Origins of Asthma Study). Open circles represent HapMap<sup>5</sup> subjects of known ethnicities (red, CEU; green, YRI; black, CHB/JPT; purple, MEX). Blue plus signs (+) represent European American study subjects.

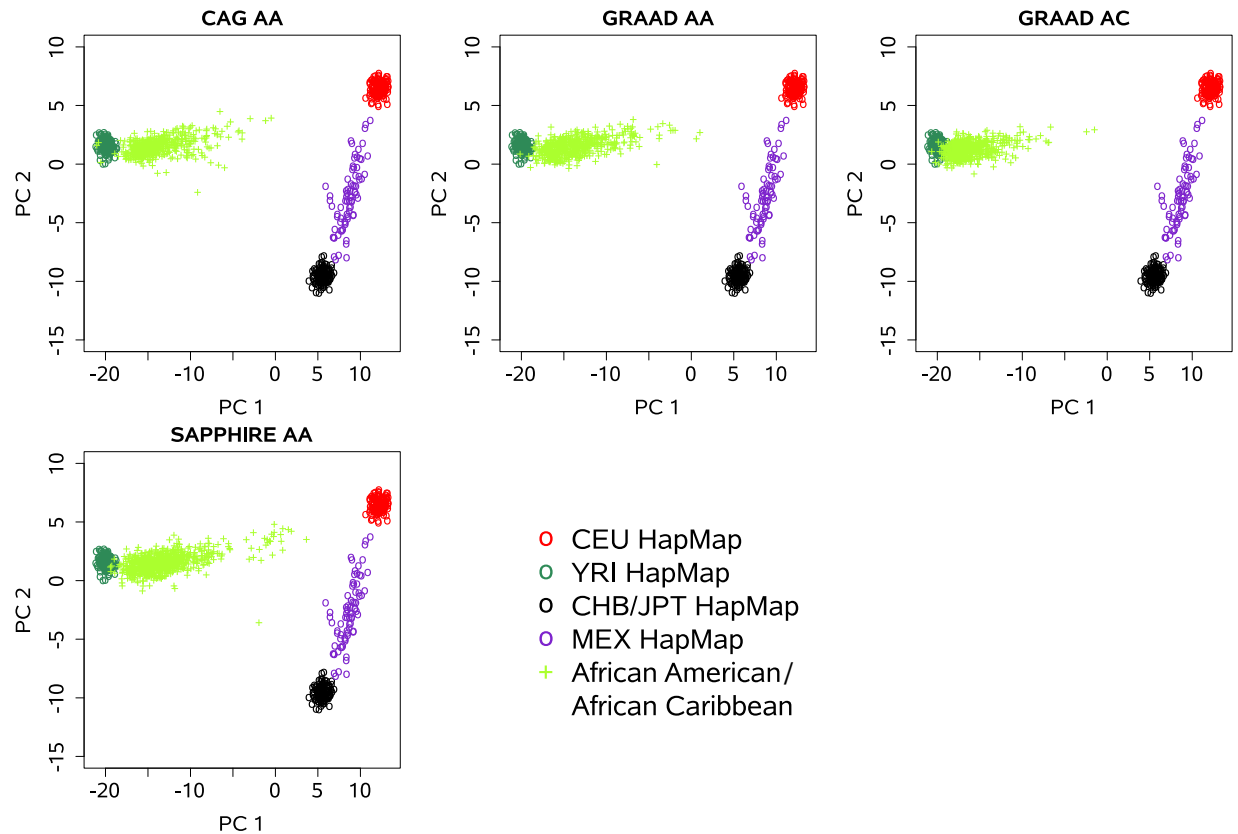

**Supplementary Figure 8: PCA of African ancestry studies projected onto HapMap subjects.** Each panel represents one of the 4 African ancestry studies included in the meta analysis<sup>2,3</sup> (CAG, Chicago Asthma Genetics Study; GRAAD, Genomic Research on Asthma in the African Diaspora and Barbados [-AA, African Americans; -AC, African Caribbeans]; SAPPHIRE, The Study of Asthma Phenotypes and Pharmacogenomic Interactions by Race-Ethnicity). Open circles represent HapMap subjects of known ethnicities (red, CEU; green, YRI; black, CHB/JPT; purple, MEX). Yellow-green plus signs (+) represent African ancestry study subjects.



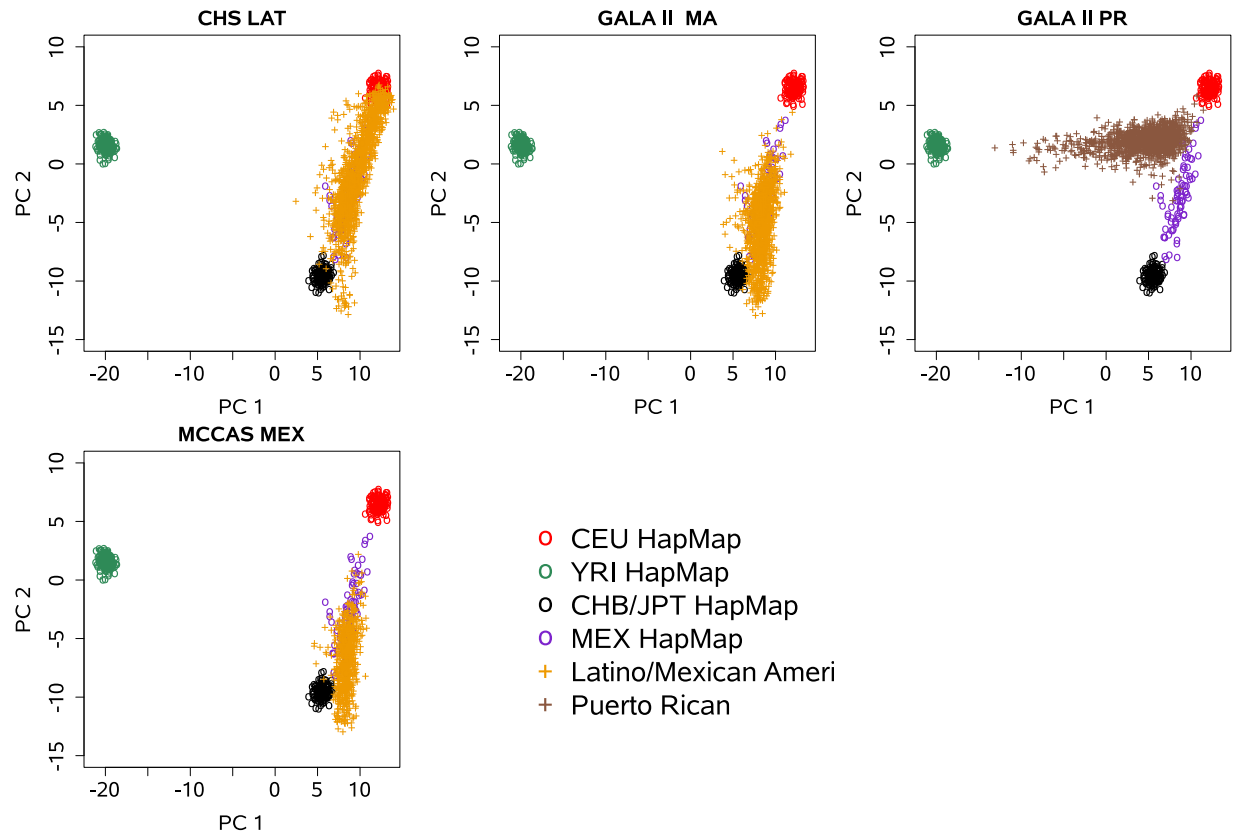

**Supplementary Figure 9: PCA of Latino studies projected onto HapMap subjects.** Each panel represents one of the 4 Latino studies included in the meta analysis<sup>2,3</sup> (CHS, The Children’s Health Study; GALA II, Genes-Environment & Admixture in Latino Asthmatics [-MA, Mexican American; -PR, Puerto Rican]; MCCAS, Mexico City Childhood Asthma Study [-MEX, Mexican]). Open circles represent HapMap subjects of known ethnicities (red, CEU; green, YRI; black, CHB/JPT; purple, MEX). Orange and brown plus signs (+) represent Latino and Puerto Rican study subjects, respectively.

**Supplementary Table 1: Number of variants on the exome array that passed QC and are variable in 11,225 study subjects.**

| Ethnic group     | Total variants | Private variants | Common variants | Low-frequency variants | Rare variants |
|------------------|----------------|------------------|-----------------|------------------------|---------------|
| EA (N=4,363)     | 133,748        | 17,227           | 26,967          | 9,470                  | 97,311        |
| AA (N=2,308)     | 139,694        | 14,704           | 31,803          | 19,496                 | 88,395        |
| LAT (N=4,554)    | 159,189        | 13,559           | 28,005          | 10,667                 | 120,517       |
| Total (N=11,225) | 197,339        | -                | 23,206          | 36,413                 | 137,720       |
| Total Functional | 171,677        | -                | 9,459           | 32,681 <sup>a</sup>    | 129,537       |

EA, European American; AA, African Ancestry; LAT, Latino.

<sup>a</sup>Variants included in single-variant meta-analyses.

Total counts for common and rare variants include SNPs with allele frequencies  $\geq 5\%$  or  $< 1\%$ , respectively, in all three ethnic groups; the remaining variants are referred to as low frequency. Breakdown of low frequency variants by functional category is provided in Supplementary Table 2.

**Supplementary Table 2: Variants included in single variant analyses.**

| Variant type | Total (N=11,225) | MAF (1-5%)   |              |               |
|--------------|------------------|--------------|--------------|---------------|
|              |                  | EA (N=4,363) | AA (N=2,308) | LAT (N=4,554) |
| Missense     | 32,157           | 8,095        | 17,606       | 9,350         |
| Nonsense     | 296              | 84           | 159          | 83            |
| Splice site  | 228              | 70           | 96           | 86            |
| Total        | 32,681           | 8,249        | 17,861       | 9,519         |

MAF Minor allele frequency; EA, European American; AA, African Ancestry; LAT, Latino.

### Supplementary Table 3: Variants included in the gene-based meta-analyses at associated genes

#### A. Functional variants: all missense, nonsense and splice site

| Meta-analysis | Gene         | Chr.             | No. variants | P                      | Variants included | Location     | Variant Type              | Alleles | EA MAF                | AA MAF     | LAT MAF  | PolyPhen-2 score |     |        |        |        |       |
|---------------|--------------|------------------|--------------|------------------------|-------------------|--------------|---------------------------|---------|-----------------------|------------|----------|------------------|-----|--------|--------|--------|-------|
| Combined      | <i>GSDMB</i> | 17               | 16           | $6.10 \times 10^{-10}$ | rs150508589       | 38061072     | c.C1205G p.S402C          | C/G     | 0.0015                | 0.0007     | 0.0010   | 1                |     |        |        |        |       |
|               |              |                  |              |                        | rs16965388        | 38062139     | c.C949T p.R317C           | A/G     | 0.0006                | 0.1083     | 0.0169   | 0.27             |     |        |        |        |       |
|               |              |                  |              |                        | rs2305479         | 38062217     | c.G871A p.G291R           | T/C     | 0.4850                | 0.1620     | 0.3349   | 1                |     |        |        |        |       |
|               |              |                  |              |                        | rs35266519        | 38062390     | c.G823A p.D275N           | T/C     | 0.0102                | 0.0017     | 0.0020   | 0.002            |     |        |        |        |       |
|               |              |                  |              |                        | rs199530486       | 38062422     | c.T791C p.L264P           | G/A     | 0.0002                | 0          | 0        | 1                |     |        |        |        |       |
|               |              |                  |              |                        | rs35104165        | 38062503     | c.A710G p.D237G           | C/T     | 0.0385                | 0.0068     | 0.0254   | 0.987            |     |        |        |        |       |
|               |              |                  |              |                        | rs141418331       | 38062509     | c.C704T p.S235L           | A/G     | 0                     | 0          | 0.0001   | 0.002            |     |        |        |        |       |
|               |              |                  |              |                        | rs199540130       | 38063233     | c.T669G p.D223E           | C/A     | 0                     | 0.0013     | 0.0002   | 0.987            |     |        |        |        |       |
|               |              |                  |              |                        | rs11078928        | 38064469     | c.662-2A>G (NM_001165959) | C/T     | 0.4456                | 0.1217     | 0.3052   | 0                |     |        |        |        |       |
|               |              |                  |              |                        | rs201723403       | 38066146     | c.C439T p.R147X           | A/G     | 0                     | 0          | 0.0002   | 0                |     |        |        |        |       |
|               |              |                  |              |                        | rs12450091        | 38068621     | c.C278T p.T93M            | C/T     | 0.0023                | 0.0031     | 0.1945   | 0.002            |     |        |        |        |       |
|               |              |                  |              |                        | rs140714868       | 38068708     | c.A233G p.Q78R            | A/G     | 0.0002                | 0.0015     | 0        | 0.69             |     |        |        |        |       |
|               |              |                  |              |                        | rs142509403       | 38073337     | c.C180A p.D60E            | C/T     | 0.0007                | 0          | 0        | 0.5              |     |        |        |        |       |
|               |              |                  |              |                        | rs150941805       | 38073390     | c.G34T p.V12L             | T/G     | 0.0009                | 0.0002     | 0.0002   | 1                |     |        |        |        |       |
|               |              |                  |              |                        | rs150365108       | 38073536     | c.C278T p.T93M            | A/C     | 0                     | 0.0002     | 0        | 0.977            |     |        |        |        |       |
|               |              |                  |              |                        | rs138635056       | 38073569     | c.A1G p.M1V               | C/T     | 0                     | 0.0039     | 0.0002   | 0.99             |     |        |        |        |       |
|               |              |                  |              |                        | Combined          | <i>ZPBP2</i> | 17                        | 7       | $1.34 \times 10^{-6}$ | rs35591738 | 38027030 | c.C202G p.P68A   | G/C | 0.0094 | 0.0013 | 0.0116 | 1     |
|               |              |                  |              |                        |                   |              |                           |         |                       | rs35829084 | 38027824 | c.G352A p.A118T  | A/G | 0.0002 | 0.1025 | 0.0077 | 0.155 |
| rs114337101   | 38028598     | c.A482G p.D161G  | G/A          | 0                      |                   |              |                           |         |                       | 0          | 0.0001   | -                |     |        |        |        |       |
| rs11557467    | 38028634     | c.G518T p.S173I  | T/G          | 0.4933                 |                   |              |                           |         |                       | 0.3924     | 0.3576   | 0.295            |     |        |        |        |       |
| rs138757022   | 38031564     | c.T766A p.F256I  | A/T          | 0                      |                   |              |                           |         |                       | 0.0013     | 0.0001   | 0.201            |     |        |        |        |       |
| rs115778431   | 38031648     | c.A850G p.K284E  | G/A          | 0.0039                 |                   |              |                           |         |                       | 0.0013     | 0.0012   | 1                |     |        |        |        |       |
| rs35302660    | 38033048     | c.C1003G p.Q335E | G/C          | 0.0009                 |                   |              |                           |         |                       | 0.1221     | 0.0191   | 0.017            |     |        |        |        |       |
| rs150508589   | 38061072     | c.C1205G p.S402C | C/G          | 0.0016                 |                   |              |                           |         |                       | 0.0006     | 0.0010   | 1                |     |        |        |        |       |
| Latino        | <i>GSDMB</i> | 17               | 12           | $1.02 \times 10^{-6}$  | rs16965388        | 38062139     | c.C949T p.R317C           | A/G     | 0.0006                | 0.1083     | 0.0169   | 0.27             |     |        |        |        |       |
|               |              |                  |              |                        | rs2305479         | 38062217     | c.G871A p.G291R           | T/C     | 0.4850                | 0.162      | 0.3349   | 1                |     |        |        |        |       |
|               |              |                  |              |                        | rs35266519        | 38062390     | c.G823A p.D275N           | T/C     | 0.0102                | 0.0017     | 0.0020   | 0.002            |     |        |        |        |       |
|               |              |                  |              |                        | rs35104165        | 38062503     | c.A710G p.D237G           | C/T     | 0.0385                | 0.0068     | 0.0254   | 0.987            |     |        |        |        |       |

|                  |       |    |    |                       |             |          |                              |     |        |        |         |       |
|------------------|-------|----|----|-----------------------|-------------|----------|------------------------------|-----|--------|--------|---------|-------|
|                  |       |    |    |                       | rs141418331 | 38062509 | c.C704T p.S235L              | A/G | 0      | 0      | 0.0001  | 0.002 |
|                  |       |    |    |                       | rs199540130 | 38063233 | c.T669G p.D223E              | C/A | 0      | 0.0013 | 0.0002  | 0.987 |
|                  |       |    |    |                       | rs11078928  | 38064469 | c.662-2A>G<br>(NM_001165959) | C/T | 0.4456 | 0.1217 | 0.3052  | 0     |
|                  |       |    |    |                       | rs201723403 | 38066146 | c.C439T p.R147X              | A/G | 0      | 0      | 0.0002  | 0     |
|                  |       |    |    |                       | rs12450091  | 38068621 | c.A365G p.E122G              | C/T | 0.0023 | 0.0031 | 0.1945  | 0.002 |
|                  |       |    |    |                       | rs150941805 | 38073390 | c.C180A p.D60E               | T/G | 0.0008 | 0.0002 | 0.0002  | 1     |
|                  |       |    |    |                       | rs138635056 | 38073569 | c.A1G p.M1V                  | C/T | 0      | 0.0039 | 0.0002  | 0.99  |
| Latino           | ZPBP2 | 17 | 7  | 1.73x10 <sup>-6</sup> | rs35591738  | 38027030 | c.C202G p.P68A               | G/C | 0.0093 | 0.0013 | 0.0116  | 1     |
|                  |       |    |    |                       | rs35829084  | 38027824 | c.G352A p.A118T              | A/G | 0.0002 | 0.1025 | 0.0077  | 0.155 |
|                  |       |    |    |                       | rs114337101 | 38028598 | c.A482G p.D161G              | G/A | 0      | 0      | 0.0001  | -     |
|                  |       |    |    |                       | rs11557467  | 38028634 | c.G518T p.S173I              | T/G | 0.4933 | 0.3924 | 0.3576  | 0.295 |
|                  |       |    |    |                       | rs138757022 | 38031564 | c.T766A p.F256I              | A/T | 0      | 0.0013 | 0.0001  | 0.201 |
|                  |       |    |    |                       | rs115778431 | 38031648 | c.A850G p.K284E              | G/A | 0.0038 | 0.0013 | 0.0012  | 1     |
|                  |       |    |    |                       | rs35302660  | 38033048 | c.C1003G p.Q335E             | G/C | 0.0008 | 0.1221 | 0.0191  | 0.017 |
| African Ancestry | MTHFR | 1  | 11 | 1.72x10 <sup>-6</sup> | rs35737219  | 11850750 | c.C1958T p.T653M             | A/G | 0.0245 | 0.0033 | 0.0126  | 0.002 |
|                  |       |    |    |                       | rs2274976   | 11850927 | c.G1781A p.R594Q             | T/C | 0.0502 | 0.0266 | 0.0411  | 0     |
|                  |       |    |    |                       | rs45449298  | 11852411 | c.G1556T p.R519L             | A/C | 0.0001 | 0.0042 | 0.0002  | 0.422 |
|                  |       |    |    |                       | rs45496998  | 11852412 | c.C1555T p.R519C             | A/G | 0.0003 | 0.0066 | 0.00181 | 0.997 |
|                  |       |    |    |                       | rs144594875 | 11854076 | c.G1418A p.R473Q             | T/C | 0      | 0.0015 | 0       | 0.797 |
|                  |       |    |    |                       | rs139645527 | 11854086 | c.G1408C p.E470Q             | G/C | 0.0029 | 0.0002 | 0.0009  | 0.004 |
|                  |       |    |    |                       | rs143466425 | 11855279 | c.G907A p.V303M              | T/C | 0      | 0.0002 | 0       | 0.999 |
|                  |       |    |    |                       | rs142612062 | 11855398 | c.A788C p.H263P              | G/T | 0      | 0.0011 | 0.0001  | 0.283 |
|                  |       |    |    |                       | rs150847674 | 11856376 | c.G667A p.D223               | T/C | 0      | 0.0042 | 0.0001  | 0.702 |
|                  |       |    |    |                       | rs1801133   | 11856378 | c.C665T p.A222V              | A/G | 0.3348 | 0.1105 | 0.449   | 0.999 |
|                  |       |    |    |                       | rs149514973 | 11861298 | c.G395A p.R132H              | T/C | 0      | 0.0004 | 0       | 0     |

## B. Functional variants: PolyPhen-2 probably damaging variants only

| Meta-analysis | Gene  | Chr. | No. variants | P                     | Variants included | Location | Variant Type    | Alleles | EA MAF | AA MAF | LAT MAF | PolyPhen-2 score |
|---------------|-------|------|--------------|-----------------------|-------------------|----------|-----------------|---------|--------|--------|---------|------------------|
| Combined      | GSDMB | 17   | 7            | 4.09x10 <sup>-8</sup> | rs2305479         | 38062217 | c.G871A p.G291R | T/C     | 0.4850 | 0.1620 | 0.3349  | 1                |
|               |       |      |              |                       | rs199530486       | 38062422 | c.T791C p.L264P | G/A     | 0.0002 | 0.0000 | 0.0000  | 1                |
|               |       |      |              |                       | rs35104165        | 38062503 | c.A710G p.D237G | C/T     | 0.0386 | 0.0069 | 0.0255  | 0.987            |



**Supplementary Table 4: Representation of genes on the exome array with functional variants in the whole genome sequences of 278 asthmatic individuals.**

| Ethnic group | No. genes not represented on the array | No. genes represented on the array but not all WGS variants included | No. genes represented on the array and all WGS functional variants included |
|--------------|----------------------------------------|----------------------------------------------------------------------|-----------------------------------------------------------------------------|
| EA           | 2,524 (20.08%)                         | 4,604 (36.63%)                                                       | 5,440 (43.28%)                                                              |
| AA           | 2,389 (16.53%)                         | 7,198 (49.80%)                                                       | 4,865 (33.66%)                                                              |
| LAT          | 2,576 (20.70%)                         | 4,729 (38.01%)                                                       | 5,136 (41.28%)                                                              |
| COMB         | 2,137 (13.06%)                         | 10,686 (65.32%)                                                      | 3,536 (21.61%)                                                              |

No, number; WGS, whole genome sequence; EA, European American; AA, African American; LAT, Latino; COMB, combined.

**Supplementary Table 5: Exome array variants removed from analysis.**

| Quality control exclusion category         | Probes removed |
|--------------------------------------------|----------------|
| Call rate <95%                             | 2,280          |
| SNPs not variable in our study             | 47,455         |
| European American HWE                      | 229            |
| African American HWE                       | 385            |
| African Caribbean HWE                      | 138            |
| Mexican-American HWE                       | 527            |
| Puerto Rican HWE                           | 242            |
| Mitochondria SNPs                          | 163            |
| Caution site                               | 333            |
| <b>Total unique number of SNPs removed</b> | <b>50,437</b>  |

HWE, Hardy-Weinberg equilibrium.

**Supplementary Table 6: Total subject exclusions.**

| Exclusion Category                | No. Subjects |
|-----------------------------------|--------------|
| Gender discordancy                | 27           |
| Sample duplication <sup>a</sup>   | 107          |
| Ancestry discordancy <sup>b</sup> | 56           |
| Mendelian error <sup>c</sup>      | 9            |
| Missing case/control status       | 7            |
| Incomplete trios <sup>c</sup>     | 473          |
| <b>Total subjects removed</b>     | <b>679</b>   |

No, Number;

<sup>a</sup>Sample with lowest genotype call rate excluded.

<sup>b</sup>Sample excluded if either of the top two inferred principle component was more than six standard deviations from the mean.

<sup>c</sup>Case-parent trios only.

### **Supplementary Note 1:** Description of the Agricultural Lung Health Study.

The Agricultural Lung Health Study (ALHS) is a case-cohort study nested within the larger Agricultural Health Study (AHS)<sup>4</sup>. The AHS includes 52,394 subjects who are private pesticide applicators (mainly farmers) in North Carolina and Iowa and 32,345 spouses of farmers. Applicators enrolled in the study from 1993 to 1997 at pesticide licensing facilities by completing self-administered questionnaires. Subjects have been followed up by questionnaires. ALHS recruited participants based on their response to questions about current asthma and asthma symptoms reported during the AHS telephone follow-up interview conducted between 2005-2010. Current asthma cases who were selected for screening were defined as 1) presumptive current asthma (doctor diagnosed asthma with current symptoms or medication use, 81%) or 2) presumptive undiagnosed asthma (persistent wheeze or inhaler use for asthmatic symptoms, 19%). A random cohort sample was also generated from among respondents to the 2005-2010 telephone interview. DNA was extracted from blood for most subjects (approximately 95%), with the remainder from buccal cells collected using Oragene kits (DNA Genotek, Kanata, Ontario, Canada). Participants in the current study were subjects who self-reported as Caucasian enrolled from February 2009 through August 2011. Genotyping for the Illumina HumanExome BeadChip was conducted at the Genetic Resources Core Facility, Johns Hopkins Institute of Genetic Medicine, Baltimore, MD. From among 1,653 subjects genotyped, 31 failed quality control (3 sex discordances and 28 investigator reported exclusions), 44 were not of Caucasian American based on principal components analysis leaving 1,578 subjects for analysis including 776 cases and 802 controls.

### **Supplementary Note 2:** Additional probe and genotyping quality evaluation.

To further evaluate probe quality in the exome array and genotype calling, genotypes in the 7,879 EVE samples were re-called using optiCall<sup>7</sup>. Out of the SNPs that had passed QC filters, 5,244 SNPs (2.15%) resulted in optiCall call rates below 95% and 1,908 SNPs (0.78%) had concordance rates less than 99% between Illumina's genotype caller (GenCall) and optiCall (overall 6,302 unique SNPs). In addition, 82 of the 278 asthmatics with WGS were also genotyped on the exome array platform (including only samples genotyped at the NWGC). Genotype concordance rates for these 82 individuals were calculated for each of the two genotype callers and SNPs were flagged if 5 or more samples (6%) were identified as discordant. GenCall resulted in 3,079 (1.24%) discordant SNPs while optiCall had 3,567 SNPs (1.43%). Based on the slightly higher concordance rate for GenCall, we selected to continue with the original Illumina genotype caller algorithm.

### Supplementary References:

1. Lee, S., Teslovich, T. M., Boehnke, M. & Lin, X. General framework for meta-analysis of rare variants in sequencing association studies. *Am. J. Hum. Genet.* **93**, 42–53 (2013).
2. Torgerson, D. G. *et al.* Meta-analysis of genome-wide association studies of asthma in ethnically diverse North American populations. *Nat. Genet.* **43**, 887–892 (2011).
3. Myers, R. A. *et al.* Further replication studies of the EVE Consortium meta-analysis identifies 2 asthma risk loci in European Americans. *J. Allergy Clin. Immunol.* **130**, 1294–1301 (2012).
4. Alavanja, M. C. *et al.* The Agricultural Health Study. *Environ. Health Perspect.* **104**, 362–369 (1996).
5. Gibbs, R. A. *et al.* The International HapMap Project. *Nature* **426**, 789–796 (2003).
6. Adzhubei, I. A. *et al.* A method and server for predicting damaging missense mutations. *Nat. Methods* **7**, 248–249 (2010).
7. Shah, T. S. *et al.* optiCall: a robust genotype-calling algorithm for rare, low-frequency and common variants. *Bioinformatics* **28**, 1598–1603 (2012).
